# Supplementary figures and images for: Exploring cellular behaviour with multi-walled carbon nanotube constructs
Source: Royal Society of Chemistry journal article supplement (doi:10.1039/b617708e), 2007-01-01

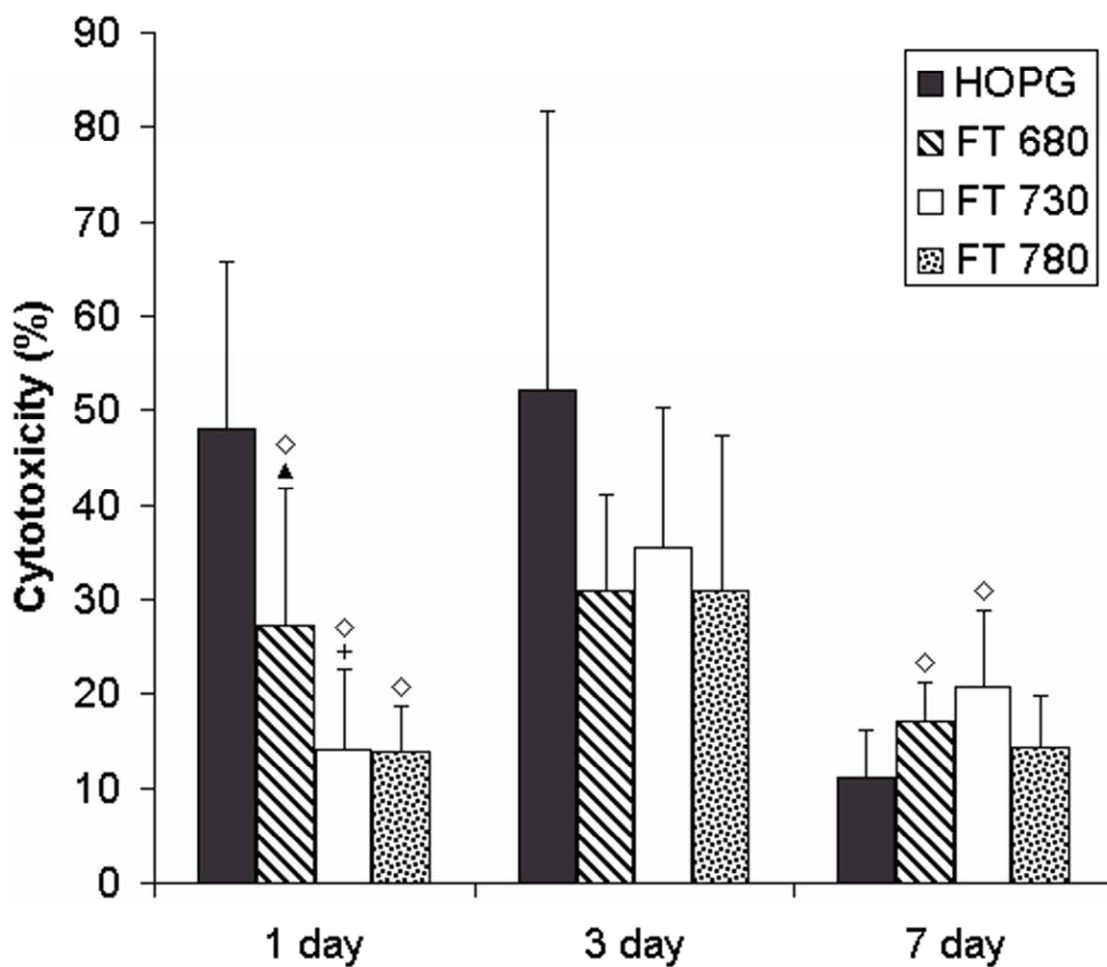

Supplement: b617708e1.pdf [file b617708e1.pdf]

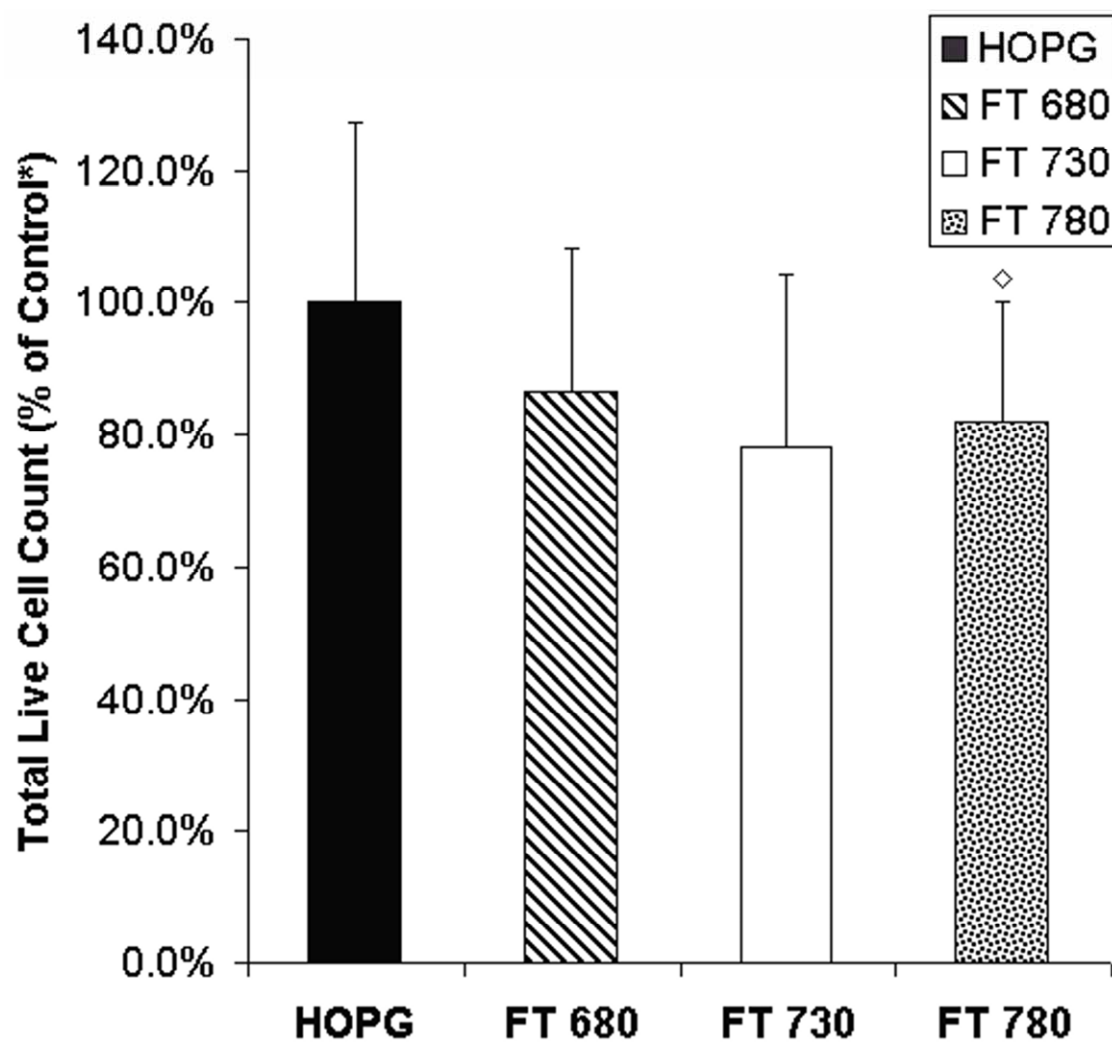

Supplement: b617708e2.pdf [file b617708e2.pdf]
